# Supplementary material for: Mapping brain state-dependent sensory responses across the mouse cortex
Source: PubMed Central journal article supplement — iScience. 2024 Apr 9;27(5):109692. doi: 10.1016/j.isci.2024.109692 (PMC11059133; doi:10.1016/j.isci.2024.109692), 2024-04-09
Supplement: mmc1.pdf [file mmc1.pdf]

iScience, Volume 27

## **Supplemental information**

### **Mapping brain state-dependent sensory responses across the mouse cortex**

**Elena Montagni, Francesco Resta, Núria Tort-Colet, Alessandro Scaglione, Giacomo Mazzamuto, Alain Destexhe, Francesco Saverio Pavone, and Anna Letizia Allegra Mascaro**

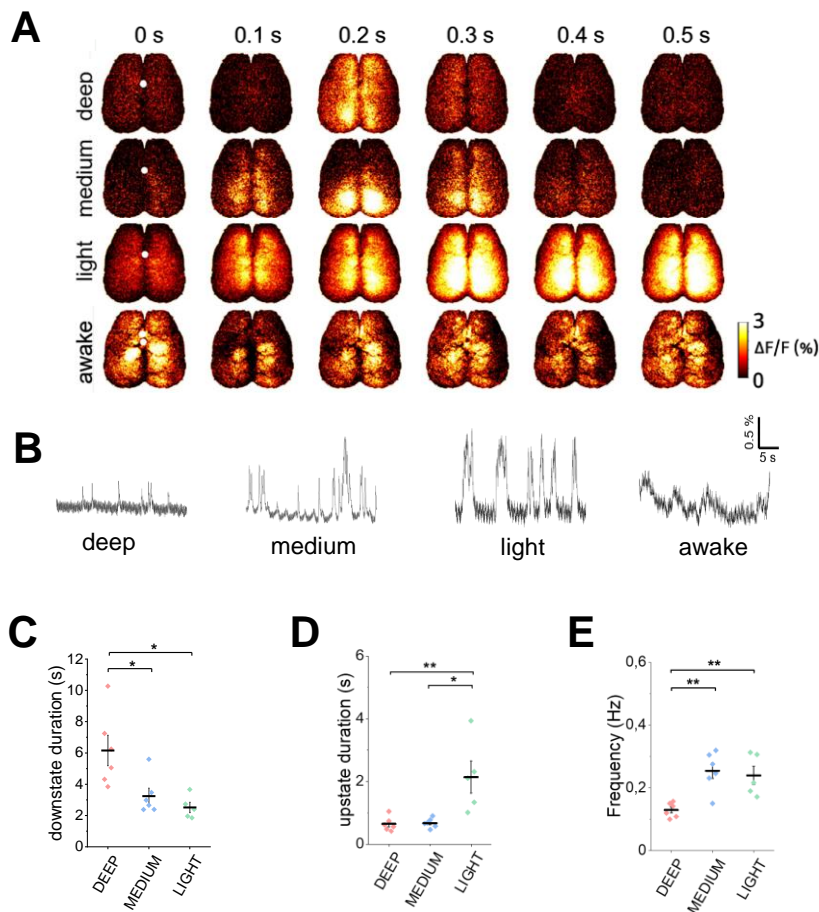

**Supplementary Figure 1. Brain state dependence of the distributed cortical response in resting state conditions, related to Figure 1.** (a) Representative sequences of resting-state cortical activations in three anesthetized brain states: awake, light, medium and deep isoflurane anesthesia (11.6 mm x 11.6 mm, frame rate 40 Hz). Scale bar, 1 mm. White dots indicate bregma. (b) Representative calcium traces averaged over the entire cortical surface in the four brain states. (c-e) Characterization of the three brain states in terms of average down states duration (c, deep vs light  $p = 0.01$ ; deep vs medium  $p = 0.008$ ), up states duration (d, deep vs light  $p = 0.005$ , light vs medium  $p = 0.006$ ), and up states frequency (e, deep vs light  $p = 0.009$ ; deep vs medium  $p = 0.002$ ). LME with Bonferroni correction (\*  $p < 0.05$ ; \*\*  $p < 0.01$ ; \*\*\*  $p < 0.001$ ) Data are shown as mean  $\pm$  SEM, dots show single animals.  $n_{\text{deep}} = 6$  mice,  $n_{\text{medium}} = 6$  mice,  $n_{\text{light}} = 5$  mice

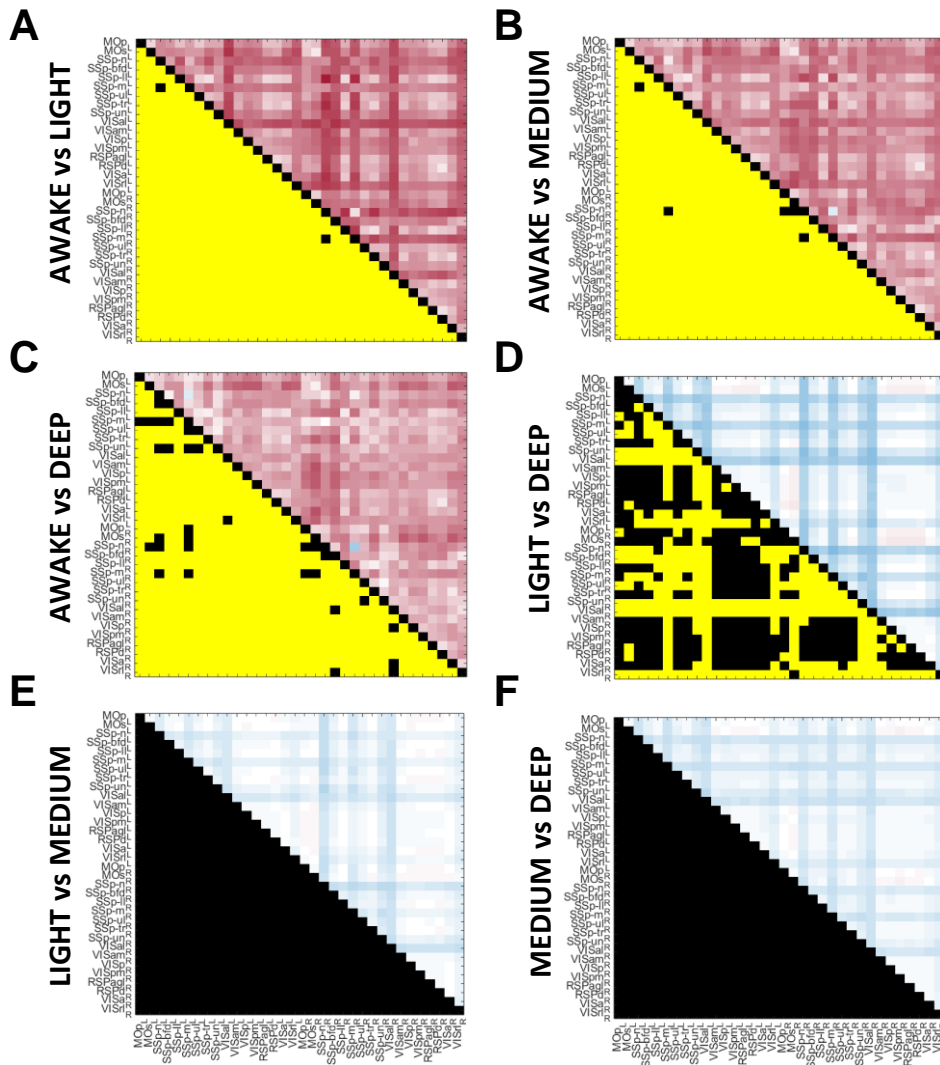

**Supplementary Figure 2. Comparison of seFC across brain states, related to Figure 1.**

Matrices displaying differences in seFC between all the four brain states (a) awake vs light, (b) awake vs medium, (c) awake vs deep, (d) light vs deep, (e) light vs medium, (f) medium vs deep. The quantification of the differences is shown in the upper part of the matrices and the corresponding statistical significance is reported in the bottom part (black square = non-significant; yellow square = Benjamin-Hochberg corrected  $P < 0.05$ ).  $n_{\text{deep}} = 6$  mice,  $n_{\text{medium}} = 6$  mice,  $n_{\text{light}} = 5$  mice,  $n_{\text{awake}} = 5$  mice.

**A**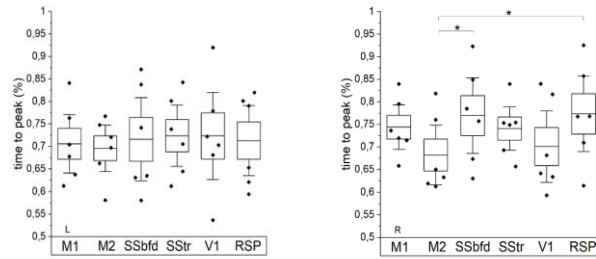**B**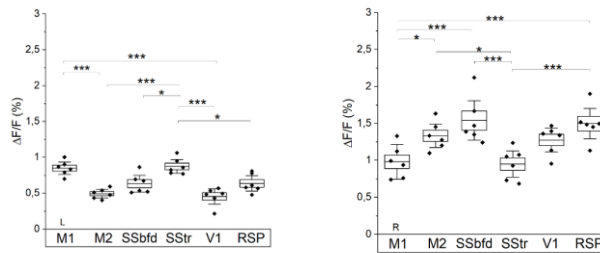

**Supplementary Figure 3. Features of the late component of the sensory-evoked response in medium anesthesia, related to Figure 4.** Box plots displaying the average time to peak (a) and amplitude ( $\Delta F/F$ ) (b) of the late component of the sensory-evoked response for 6 cortical regions on the left hemisphere (L, left panel) and on the right hemisphere in medium anesthesia (R, right panel) ( $n = 6$ , one-way ANOVA). Box shows the standard error range, black line is the mean and whiskers lengths are SD.

|              | awake        | light    | intermediate | deep         |
|--------------|--------------|----------|--------------|--------------|
| awake        | 1            | 0.400993 | 0.000009     | 5.223029e-15 |
| light        | 0.400993     | 1        | 0.090728     | 0.000002     |
| intermediate | 0.000009     | 0.090728 | 1            | 0.038349     |
| deep         | 5.223029e-15 | 0.000002 | 0.038349     | 1            |

**Table S1. Comparison of the complexity index in different brain states: Experimental data, related to Figure 2.** Post hoc test (Dunn's test, with Bonferroni correction) p values comparing the CI of the different pairs of brain states in the experimental data.

|           | b = 0pA      | b = 30pA | b = 60pA     | b = 120pA    |
|-----------|--------------|----------|--------------|--------------|
| b = 0pA   | 1            | 0.038974 | 4.954822e-08 | 2.594177e-14 |
| b = 30pA  | 0.038974     | 1        | 0.014127     | 0.000002     |
| b = 60pA  | 4.954822e-08 | 0.014127 | 1            | 2.240185e-01 |
| b = 120pA | 2.594177e-14 | 0.000002 | 2.240185e-01 | 1            |

**Table S2. Comparison of the complexity index in different brain states: simulated data, related to Figure 2.** Post hoc test (Dunn's test, with Bonferroni correction) p values comparing the CI of the different pairs of brain states in the simulated data.

|           | BRAIN-STATE (units : s) |   |            |   |           |   |           |   |
|-----------|-------------------------|---|------------|---|-----------|---|-----------|---|
|           | DEEP (1)                | * | MEDIUM (2) | * | LIGHT (3) | * | AWAKE (4) | * |
| MOp_L     | 0,16±0,03               |   | 0,15±0,05  |   | 0,16±0,06 |   | 0,24±0,14 |   |
| MOs_L     | 0,16±0,02               |   | 0,16±0,05  |   | 0,16±0,06 |   | 0,21±0,12 |   |
| SSp-n_L   | 0,18±0,02               |   | 0,17±0,05  |   | 0,22±0,06 |   | 0,33±0,32 |   |
| SSp-bfd_L | 0,16±0,02               |   | 0,15±0,04  |   | 0,16±0,06 |   | 0,45±0,37 |   |
| SSp-ll_L  | 0,15±0,02               |   | 0,16±0,05  |   | 0,17±0,07 |   | 0,18±0,02 |   |
| SSp-m_L   | 0,18±0,02               |   | 0,17±0,05  |   | 0,19±0,06 |   | 0,17±0,12 |   |
| SSp-ul_L  | 0,17±0,02               |   | 0,16±0,05  |   | 0,17±0,07 |   | 0,26±0,12 |   |
| SSp-tr_L  | 0,15±0,02               |   | 0,15±0,04  |   | 0,15±0,05 |   | 0,2±0,04  |   |
| SSp-un_L  | 0,17±0,02               |   | 0,16±0,04  |   | 0,18±0,05 |   | 0,32±0,1  |   |
| VISal_L   | 0,14±0,03               |   | 0,15±0,04  |   | 0,16±0,04 |   | 0,31±0,35 |   |
| VISam_L   | 0,15±0,02               |   | 0,15±0,04  |   | 0,14±0,06 |   | 0,18±0,04 |   |
| VISp_L    | 0,17±0,03               |   | 0,16±0,05  |   | 0,15±0,05 |   | 0,15±0,05 |   |
| VISpm_L   | 0,15±0,02               |   | 0,15±0,05  |   | 0,13±0,05 |   | 0,18±0,06 |   |
| RSPagl_L  | 0,15±0,02               |   | 0,15±0,04  |   | 0,13±0,05 |   | 0,22±0,05 |   |
| RSPd_L    | 0,15±0,02               |   | 0,15±0,04  |   | 0,13±0,05 |   | 0,19±0,01 |   |
| VISa_L    | 0,15±0,02               |   | 0,15±0,04  |   | 0,13±0,05 |   | 0,17±0,02 |   |
| VISrl_L   | 0,15±0,02               |   | 0,14±0,04  |   | 0,15±0,05 |   | 0,17±0,04 |   |
| MOp_R     | 0,14±0,02               |   | 0,14±0,04  |   | 0,15±0,05 |   | 0,13±0,02 |   |
| MOs_R     | 0,14±0,02               |   | 0,14±0,04  |   | 0,15±0,04 |   | 0,13±0,02 |   |
| SSp-n_R   | 0,15±0,02               |   | 0,18±0,04  |   | 0,18±0,05 |   | 0,19±0,16 |   |
| SSp-bfd_R | 0,14±0,01               |   | 0,13±0,03  |   | 0,13±0,03 |   | 0,11±0,01 |   |
| SSp-ll_R  | 0,14±0,02               |   | 0,13±0,04  |   | 0,15±0,04 |   | 0,14±0,01 |   |
| SSp-m_R   | 0,16±0,02               |   | 0,16±0,05  |   | 0,17±0,05 |   | 0,36±0,26 |   |
| SSp-ul_R  | 0,14±0,02               |   | 0,14±0,04  |   | 0,15±0,05 |   | 0,12±0,02 |   |
| SSp-tr_R  | 0,14±0,01               |   | 0,13±0,03  |   | 0,14±0,04 |   | 0,11±0,01 |   |
| SSp-un_R  | 0,13±0,03               |   | 0,14±0,04  |   | 0,15±0,05 |   | 0,11±0,01 |   |
| VISal_R   | 0,13±0,02               |   | 0,13±0,02  |   | 0,13±0,03 |   | 0,11±0,02 |   |
| VISam_R   | 0,13±0,02               |   | 0,13±0,04  |   | 0,13±0,04 |   | 0,13±0,02 |   |
| VISp_R    | 0,15±0,03               |   | 0,16±0,03  |   | 0,12±0,03 |   | 0,15±0,02 |   |
| VISpm_R   | 0,13±0,02               |   | 0,13±0,04  |   | 0,13±0,04 |   | 0,13±0,02 |   |
| RSPagl_R  | 0,14±0,03               |   | 0,13±0,04  |   | 0,13±0,04 |   | 0,15±0,02 |   |
| RSPd_R    | 0,14±0,02               |   | 0,14±0,03  |   | 0,13±0,04 |   | 0,16±0,01 |   |
| VISa_R    | 0,15±0,02               |   | 0,15±0,04  |   | 0,14±0,04 |   | 0,16±0,03 |   |
| VISrl_R   | 0,13±0,02               |   | 0,13±0,03  |   | 0,12±0,03 |   | 0,11±0,01 |   |

**Table S3. Averaged onset for each cortical region in four brain states, related to Figure 3b.**

Brain states: deep (1), medium (2), light (3), and awake (4). For each cortical area (row), the brain state's number is used on the right side to show significant differences from the other (\* p < 0.05, mixed-effects linear regression model with Bonferroni correction). Data are shown as mean ± SEM.

| BRAIN-STATE (units : s <sup>-1</sup> ) |             |     |     |     |             |     |     |             |     |     |             |     |         |
|----------------------------------------|-------------|-----|-----|-----|-------------|-----|-----|-------------|-----|-----|-------------|-----|---------|
|                                        | DEEP (1)    | *   |     |     | MEDIUM (2)  | *   |     | LIGHT (3)   | *   |     | AWAKE (4)   | *   |         |
| MOp_L                                  | 0,115±0,039 | (2) | (3) | (4) | 0,055±0,014 | (1) |     | 0,055±0,028 | (1) |     | 0,01±0,008  | (1) |         |
| MOs_L                                  | 0,143±0,046 | (2) | (3) | (4) | 0,06±0,012  | (1) |     | 0,047±0,025 | (1) |     | 0,012±0,011 | (1) |         |
| SSp-n_L                                | 0,03±0,007  |     | (3) | (4) | 0,019±0,009 |     |     | 0,011±0,01  | (1) |     | 0,004±0,001 | (1) |         |
| SSp-bfd_L                              | 0,054±0,016 | (2) | (3) | (4) | 0,036±0,013 | (1) |     | 0,023±0,022 | (1) |     | 0,003±0,001 | (1) |         |
| SSp-II_L                               | 0,161±0,037 | (2) | (3) | (4) | 0,105±0,026 | (1) | (4) | 0,073±0,045 | (1) |     | 0,017±0,014 | (1) | (2)     |
| SSp-m_L                                | 0,025±0,008 |     |     | (4) | 0,016±0,005 |     |     | 0,013±0,011 |     |     | 0,003±0,002 | (1) |         |
| SSp-ul_L                               | 0,084±0,017 |     | (3) | (4) | 0,051±0,02  |     | (4) | 0,036±0,028 | (1) |     | 0,008±0,007 | (1) | (2)     |
| SSp-tr_L                               | 0,183±0,038 | (2) | (3) | (4) | 0,101±0,041 | (1) | (4) | 0,074±0,052 | (1) |     | 0,018±0,01  | (1) | (2)     |
| SSp-un_L                               | 0,072±0,016 |     | (3) | (4) | 0,049±0,018 |     | (4) | 0,032±0,027 | (1) |     | 0,004±0,003 | (1) | (2)     |
| VISal_L                                | 0,051±0,023 |     |     | (4) | 0,036±0,018 |     |     | 0,035±0,027 |     |     | 0,005±0,002 | (1) |         |
| VISam_L                                | 0,304±0,067 | (2) | (3) | (4) | 0,156±0,061 | (1) | (4) | 0,109±0,048 | (1) |     | 0,014±0,004 | (1) | (2)     |
| VISp_L                                 | 0,042±0,013 |     |     | (4) | 0,025±0,012 |     |     | 0,021±0,016 |     |     | 0,005±0,004 | (1) |         |
| VISpm_L                                | 0,093±0,032 |     | (3) | (4) | 0,057±0,028 |     | (4) | 0,04±0,019  | (1) |     | 0,007±0,005 | (1) | (2)     |
| RSPagl_L                               | 0,255±0,078 | (2) | (3) | (4) | 0,123±0,066 | (1) | (4) | 0,094±0,051 | (1) |     | 0,01±0,006  | (1) | (2)     |
| RSPd_L                                 | 0,3±0,068   | (2) | (3) | (4) | 0,159±0,09  | (1) | (4) | 0,103±0,054 | (1) |     | 0,015±0,013 | (1) | (2)     |
| VISa_L                                 | 0,258±0,066 |     | (3) | (4) | 0,126±0,049 |     | (4) | 0,071±0,02  | (1) |     | 0,016±0,014 | (1) | (2)     |
| VISrl_L                                | 0,162±0,041 |     |     | (4) | 0,115±0,056 |     | (4) | 0,083±0,045 |     |     | 0,013±0,008 | (1) | (2)     |
| MOp_R                                  | 0,129±0,019 | (2) | (3) | (4) | 0,078±0,021 | (1) | (4) | 0,052±0,026 | (1) | (4) | 0,011±0,006 | (1) | (2) (3) |
| MOs_R                                  | 0,155±0,029 | (2) | (3) | (4) | 0,085±0,031 | (1) | (4) | 0,049±0,024 | (1) |     | 0,014±0,013 | (1) | (2)     |
| SSp-n_R                                | 0,025±0,007 |     |     |     | 0,021±0,007 |     |     | 0,016±0,017 |     |     | 0,008±0,004 |     |         |
| SSp-bfd_R                              | 0,057±0,016 |     |     |     | 0,038±0,014 |     |     | 0,03±0,022  |     |     | 0,048±0,022 |     |         |
| SSp-II_R                               | 0,16±0,025  | (2) | (3) | (4) | 0,098±0,015 | (1) | (4) | 0,075±0,022 | (1) | (4) | 0,019±0,01  | (1) | (2) (3) |
| SSp-m_R                                | 0,029±0,003 |     |     | (4) | 0,021±0,007 |     |     | 0,016±0,016 |     |     | 0,008±0,006 | (1) |         |
| SSp-ul_R                               | 0,09±0,006  | (2) | (3) | (4) | 0,054±0,008 | (1) | (4) | 0,043±0,035 | (1) |     | 0,016±0,008 | (1) | (2)     |
| SSp-tr_R                               | 0,171±0,049 |     | (3) | (4) | 0,126±0,019 |     | (4) | 0,081±0,046 | (1) |     | 0,041±0,019 | (1) | (2)     |
| SSp-un_R                               | 0,06±0,014  |     |     |     | 0,045±0,012 |     |     | 0,041±0,03  |     |     | 0,027±0,018 |     |         |
| VISal_R                                | 0,049±0,016 |     |     |     | 0,037±0,011 |     |     | 0,033±0,023 |     |     | 0,02±0,016  |     |         |
| VISam_R                                | 0,285±0,083 | (2) | (3) | (4) | 0,168±0,067 | (1) | (4) | 0,104±0,057 | (1) |     | 0,03±0,017  | (1) | (2)     |
| VISp_R                                 | 0,039±0,018 |     |     | (4) | 0,027±0,014 |     |     | 0,022±0,013 |     |     | 0,008±0,005 | (1) |         |
| VISpm_R                                | 0,101±0,054 |     | (3) | (4) | 0,061±0,027 |     |     | 0,039±0,013 | (1) |     | 0,011±0,006 | (1) |         |
| RSPagl_R                               | 0,257±0,116 |     | (3) | (4) | 0,134±0,058 |     |     | 0,102±0,048 | (1) |     | 0,019±0,012 | (1) |         |
| RSPd_R                                 | 0,272±0,1   |     | (3) | (4) | 0,16±0,08   |     | (4) | 0,11±0,043  | (1) |     | 0,021±0,014 | (1) | (2)     |
| VISa_R                                 | 0,253±0,051 | (2) | (3) | (4) | 0,126±0,046 | (1) | (4) | 0,09±0,043  | (1) |     | 0,021±0,018 | (1) | (2)     |
| VISrl_R                                | 0,188±0,047 |     |     |     | 0,123±0,05  |     |     | 0,091±0,027 |     |     | 0,061±0,015 |     |         |

**Table S4. Averaged rising slope for each cortical region in four brain states, related to Figure 3c.**

Brain states: deep (1), medium (2), light (3), and awake (4). For each cortical area (row), the brain state's number is used on the right side to show significant differences from the other (\* p < 0.05, mixed-effects linear regression model with Bonferroni correction). Data are shown as mean ± SEM.

| BRAIN-STATE (units : s) |           |         |            |     |           |             |           |     |
|-------------------------|-----------|---------|------------|-----|-----------|-------------|-----------|-----|
|                         | DEEP (1)  | *       | MEDIUM (2) | *   | LIGHT (3) | *           | AWAKE (4) | *   |
| MOp_L                   | 0,23±0,02 |         | 0,33±0,13  |     | 0,42±0,21 |             | 0,38±0,17 |     |
| MOs_L                   | 0,23±0,03 | (3)     | 0,33±0,13  |     | 0,51±0,09 | (1)         | 0,37±0,17 |     |
| SSp-n_L                 | 0,23±0,02 | (3)     | 0,28±0,06  | (3) | 0,66±0,25 | (1) (2)     | 0,53±0,35 |     |
| SSp-bfd_L               | 0,24±0,02 | (3)     | 0,28±0,06  | (3) | 0,6±0,25  | (1) (2)     | 0,38±0,22 |     |
| SSp-II_L                | 0,23±0,03 | (3)     | 0,26±0,02  |     | 0,49±0,21 | (1)         | 0,4±0,17  |     |
| SSp-m_L                 | 0,23±0,02 |         | 0,29±0,06  |     | 0,53±0,31 |             | 0,37±0,23 |     |
| SSp-ul_L                | 0,24±0,02 | (3)     | 0,29±0,06  | (3) | 0,69±0,29 | (1) (2)     | 0,45±0,22 |     |
| SSp-tr_L                | 0,24±0,02 | (3)     | 0,3±0,12   |     | 0,61±0,29 | (1)         | 0,4±0,16  |     |
| SSp-un_L                | 0,24±0,02 | (3)     | 0,28±0,06  | (3) | 0,61±0,29 | (1) (2)     | 0,5±0,19  |     |
| VISal_L                 | 0,25±0,02 |         | 0,29±0,07  |     | 0,49±0,33 |             | 0,38±0,22 |     |
| VISam_L                 | 0,25±0,02 |         | 0,3±0,11   |     | 0,39±0,2  |             | 0,4±0,17  |     |
| VISp_L                  | 0,24±0,02 |         | 0,3±0,09   |     | 0,5±0,29  |             | 0,33±0,15 |     |
| VISpm_L                 | 0,25±0,02 |         | 0,3±0,07   |     | 0,46±0,28 |             | 0,43±0,27 |     |
| RSPagl_L                | 0,25±0,03 |         | 0,37±0,13  |     | 0,4±0,15  |             | 0,48±0,23 |     |
| RSPd_L                  | 0,25±0,02 |         | 0,3±0,12   |     | 0,4±0,16  |             | 0,43±0,18 |     |
| VISa_L                  | 0,25±0,02 | (3)     | 0,35±0,12  | (3) | 0,58±0,24 | (1)         | 0,44±0,14 |     |
| VISrl_L                 | 0,24±0,02 |         | 0,3±0,12   |     | 0,44±0,13 |             | 0,4±0,16  |     |
| MOp_R                   | 0,23±0,02 | (3)     | 0,28±0,06  | (3) | 0,58±0,26 | (1) (2)     | 0,34±0,17 |     |
| MOs_R                   | 0,23±0,02 | (3)     | 0,28±0,06  |     | 0,52±0,25 | (1)         | 0,38±0,17 |     |
| SSp-n_R                 | 0,23±0,02 | (3) (4) | 0,29±0,06  |     | 0,58±0,28 | (1) (2)     | 0,57±0,13 | (1) |
| SSp-bfd_R               | 0,23±0,02 | (3)     | 0,25±0,02  | (3) | 0,54±0,28 | (1) (2) (4) | 0,2±0,02  | (3) |
| SSp-II_R                | 0,23±0,02 | (3)     | 0,26±0,02  |     | 0,45±0,15 | (1)         | 0,4±0,17  |     |
| SSp-m_R                 | 0,23±0,03 |         | 0,29±0,06  |     | 0,54±0,34 |             | 0,62±0,18 |     |
| SSp-ul_R                | 0,23±0,02 | (3)     | 0,26±0,03  | (3) | 0,56±0,28 | (1) (2) (4) | 0,27±0,11 | (3) |
| SSp-tr_R                | 0,23±0,02 | (3)     | 0,26±0,02  | (3) | 0,54±0,28 | (1) (2)     | 0,29±0,07 |     |
| SSp-un_R                | 0,23±0,02 | (3)     | 0,28±0,06  | (3) | 0,57±0,28 | (1) (2) (4) | 0,24±0,05 | (3) |
| VISal_R                 | 0,23±0,03 |         | 0,26±0,02  |     | 0,49±0,31 |             | 0,36±0,23 |     |
| VISam_R                 | 0,23±0,03 |         | 0,3±0,12   |     | 0,49±0,28 |             | 0,39±0,16 |     |
| VISp_R                  | 0,24±0,03 |         | 0,31±0,12  |     | 0,51±0,31 |             | 0,38±0,19 |     |
| VISpm_R                 | 0,23±0,03 |         | 0,28±0,07  |     | 0,5±0,31  |             | 0,41±0,18 |     |
| RSPagl_R                | 0,23±0,03 |         | 0,3±0,13   |     | 0,36±0,1  |             | 0,39±0,21 |     |
| RSPd_R                  | 0,23±0,03 |         | 0,34±0,13  |     | 0,44±0,14 |             | 0,39±0,17 |     |
| VISa_R                  | 0,23±0,03 |         | 0,35±0,13  |     | 0,47±0,13 |             | 0,39±0,17 |     |
| VISrl_R                 | 0,23±0,02 |         | 0,3±0,12   |     | 0,43±0,14 |             | 0,27±0,02 |     |

**Table S5. Averaged time to peak for each cortical region in four brain states, related to Figure 3d.**

Brain states: deep (1), medium (2), light (3), and awake (4). For each cortical area (row), the brain state's number is used on the right side to show significant differences from the other (\* p < 0.05, mixed-effects linear regression model with Bonferroni correction). Data are shown as mean ± SEM.



|           | BRAIN-STATE (units : $\Delta F/F$ %) |         |            |         |           |             |           |             |
|-----------|--------------------------------------|---------|------------|---------|-----------|-------------|-----------|-------------|
|           | DEEP (1)                             | *       | MEDIUM (2) | *       | LIGHT (3) | *           | AWAKE (4) | *           |
| MOp_L     | 0,5±0,1                              | (4)     | 0,53±0,09  | (4)     | 0,7±0,38  | (4)         | 0,08±0,02 | (1) (2) (3) |
| MOs_L     | 0,63±0,19                            | (4)     | 0,61±0,19  | (4)     | 0,76±0,24 | (4)         | 0,11±0,04 | (1) (2) (3) |
| SSp-n_L   | 0,11±0,03                            |         | 0,12±0,02  |         | 0,18±0,07 | (4)         | 0,03±0,02 | (3)         |
| SSp-bfd_L | 0,27±0,07                            | (4)     | 0,28±0,05  | (4)     | 0,39±0,19 | (4)         | 0,04±0,02 | (1) (2) (3) |
| SSp-II_L  | 0,7±0,13                             | (4)     | 0,64±0,17  | (3) (4) | 0,97±0,26 | (2) (4)     | 0,18±0,08 | (1) (2) (3) |
| SSp-m_L   | 0,1±0,03                             |         | 0,11±0,02  |         | 0,15±0,07 | (4)         | 0,02±0,01 | (3)         |
| SSp-ul_L  | 0,36±0,07                            | (3) (4) | 0,38±0,06  | (3) (4) | 0,64±0,21 | (2) (4)     | 0,07±0,03 | (1) (2) (3) |
| SSp-tr_L  | 0,89±0,18                            | (4)     | 0,89±0,27  | (4)     | 1,17±0,42 | (4)         | 0,21±0,09 | (1) (2) (3) |
| SSp-un_L  | 0,33±0,07                            | (4)     | 0,34±0,05  | (4)     | 0,53±0,25 | (4)         | 0,05±0,03 | (1) (2) (3) |
| VISal_L   | 0,25±0,09                            | (4)     | 0,27±0,07  | (4)     | 0,35±0,17 | (4)         | 0,05±0,02 | (1) (2) (3) |
| VISam_L   | 1,47±0,38                            | (4)     | 1,47±0,4   | (4)     | 1,48±0,91 | (4)         | 0,17±0,08 | (1) (2) (3) |
| VISp_L    | 0,2±0,07                             | (4)     | 0,19±0,06  | (4)     | 0,27±0,12 | (4)         | 0,06±0,03 | (1) (2) (3) |
| VISpm_L   | 0,48±0,18                            | (4)     | 0,46±0,15  | (4)     | 0,59±0,29 | (4)         | 0,07±0,01 | (1) (2) (3) |
| RSPagl_L  | 1,23±0,41                            | (4)     | 1,26±0,27  | (4)     | 1,37±0,67 | (4)         | 0,12±0,04 | (1) (2) (3) |
| RSPd_L    | 1,42±0,37                            | (4)     | 1,34±0,36  | (4)     | 1,51±0,65 | (4)         | 0,17±0,05 | (1) (2) (3) |
| VISa_L    | 1,27±0,34                            | (4)     | 1,24±0,34  | (4)     | 1,52±0,6  | (4)         | 0,18±0,06 | (1) (2) (3) |
| VISrl_L   | 0,93±0,21                            | (4)     | 0,98±0,29  | (4)     | 1,18±0,61 | (4)         | 0,17±0,07 | (1) (2) (3) |
| MOp_R     | 0,61±0,07                            | (3) (4) | 0,59±0,01  | (3) (4) | 0,94±0,35 | (1) (2) (4) | 0,08±0,04 | (1) (2) (3) |
| MOs_R     | 0,71±0,13                            | (4)     | 0,63±0,09  | (4)     | 0,92±0,39 | (4)         | 0,14±0,05 | (1) (2) (3) |
| SSp-n_R   | 0,13±0,04                            |         | 0,13±0,04  |         | 0,23±0,13 |             | 0,09±0,06 |             |
| SSp-bfd_R | 0,31±0,07                            |         | 0,28±0,1   |         | 0,49±0,22 |             | 0,3±0,16  |             |
| SSp-II_R  | 0,75±0,1                             | (3) (4) | 0,71±0,15  | (3) (4) | 1,24±0,48 | (1) (2) (4) | 0,23±0,09 | (1) (2) (3) |
| SSp-m_R   | 0,12±0,02                            |         | 0,13±0,03  |         | 0,22±0,15 |             | 0,07±0,05 |             |
| SSp-ul_R  | 0,4±0,05                             | (3) (4) | 0,39±0,05  | (3) (4) | 0,72±0,28 | (1) (2) (4) | 0,11±0,02 | (1) (2) (3) |
| SSp-tr_R  | 0,89±0,14                            | (4)     | 0,87±0,22  | (4)     | 1,41±0,57 | (4)         | 0,34±0,09 | (1) (3)     |
| SSp-un_R  | 0,36±0,06                            | (3)     | 0,36±0,05  | (3)     | 0,67±0,29 | (1) (2) (4) | 0,18±0,08 | (3)         |
| VISal_R   | 0,3±0,11                             |         | 0,3±0,13   |         | 0,47±0,2  | (4)         | 0,16±0,09 | (3)         |
| VISam_R   | 1,53±0,34                            | (4)     | 1,47±0,48  | (4)     | 1,78±0,74 | (4)         | 0,32±0,08 | (1) (2) (3) |
| VISp_R    | 0,23±0,08                            |         | 0,21±0,08  |         | 0,32±0,14 | (4)         | 0,08±0,03 | (3)         |
| VISpm_R   | 0,55±0,18                            |         | 0,5±0,17   |         | 0,73±0,36 | (4)         | 0,13±0,04 | (3)         |
| RSPagl_R  | 1,33±0,38                            | (4)     | 1,19±0,43  | (4)     | 1,49±0,61 | (4)         | 0,19±0,06 | (1) (2) (3) |
| RSPd_R    | 1,45±0,36                            | (4)     | 1,36±0,4   | (4)     | 1,75±0,69 | (4)         | 0,22±0,07 | (1) (2) (3) |
| VISa_R    | 1,24±0,27                            | (4)     | 1,2±0,37   | (4)     | 1,56±0,64 | (4)         | 0,21±0,07 | (1) (2) (3) |
| VISrl_R   | 1,01±0,19                            |         | 1,02±0,28  |         | 1,44±0,6  | (4)         | 0,48±0,13 | (3)         |

**Table S6. Averaged peak amplitude for each cortical region in four brain states, related to Figure 3e.**

Brain states: deep (1), medium (2), light (3), and awake (4). For each cortical area (row), the brain state's number is used on the right side to show significant differences from the other (\* p < 0.05, mixed-effects linear regression model with Bonferroni correction). Data are shown as mean ± SEM.

|           | BRAIN-STATE (units : s) |         |            |         |           |         |           |         |
|-----------|-------------------------|---------|------------|---------|-----------|---------|-----------|---------|
|           | DEEP (1)                | *       | MEDIUM (2) | *       | LIGHT (3) | *       | AWAKE (4) | *       |
| MOp_L     | 0,9±0,15                | (2) (3) | 2,35±0,53  | (1) (4) | 2,54±0,62 | (1) (4) | 0,5±0,51  | (2) (3) |
| MOs_L     | 1,08±0,2                | (2) (3) | 2,64±0,49  | (1)     | 2,55±0,63 | (1) (4) | 0,59±0,48 | (2) (3) |
| SSp-n_L   | 0,5±0,17                | (2) (3) | 1,93±0,66  | (1) (4) | 2,4±0,72  | (1) (4) | 0,39±0,09 | (2) (3) |
| SSp-bfd_L | 0,83±0,16               | (2) (3) | 2,52±0,54  | (1) (4) | 2,5±0,6   | (1) (4) | 0,54±0,54 | (2) (3) |
| SSp-II_L  | 0,94±0,18               | (2) (3) | 2,51±0,53  | (1) (4) | 2,49±0,6  | (1) (4) | 0,75±0,52 | (2) (3) |
| SSp-m_L   | 0,54±0,26               | (2) (3) | 1,98±0,66  | (1) (4) | 2,43±0,6  | (1) (4) | 0,48±0,39 | (2) (3) |
| SSp-ul_L  | 0,77±0,17               | (2) (3) | 2,49±0,56  | (1) (4) | 2,49±0,6  | (1) (4) | 0,46±0,46 | (2) (3) |
| SSp-tr_L  | 1,09±0,27               | (2) (3) | 2,51±0,56  | (1) (4) | 2,55±0,63 | (1) (4) | 0,79±0,46 | (2) (3) |
| SSp-un_L  | 0,69±0,17               | (2) (3) | 2,15±0,57  | (1) (4) | 2,48±0,63 | (1) (4) | 0,63±0,58 | (2) (3) |
| VISal_L   | 0,92±0,17               | (2) (3) | 2,1±0,79   | (1) (4) | 2,55±0,64 | (1) (4) | 0,73±0,32 | (2) (3) |
| VISam_L   | 1,23±0,29               | (2) (3) | 2,63±0,54  | (1) (4) | 2,56±0,65 | (1) (4) | 0,89±0,4  | (2) (3) |
| VISp_L    | 0,74±0,22               | (2) (3) | 1,92±0,88  | (1)     | 2,55±0,63 | (1) (4) | 1,1±0,68  | (3)     |
| VISpm_L   | 1,23±0,28               | (2) (3) | 2,33±0,81  | (1) (4) | 2,57±0,65 | (1) (4) | 0,88±0,58 | (2) (3) |
| RSPagl_L  | 1,24±0,27               | (2) (3) | 2,63±0,54  | (1) (4) | 2,56±0,66 | (1) (4) | 1,1±0,56  | (2) (3) |
| RSPd_L    | 1,5±0,68                | (2) (3) | 2,63±0,54  | (1) (4) | 2,56±0,66 | (1) (4) | 0,82±0,48 | (2) (3) |
| VISa_L    | 1,52±0,67               | (2) (3) | 2,63±0,54  | (1) (4) | 2,56±0,66 | (1) (4) | 0,86±0,49 | (2) (3) |
| VISrl_L   | 1,14±0,35               | (2) (3) | 2,64±0,5   | (1) (4) | 2,56±0,65 | (1) (4) | 0,83±0,46 | (2) (3) |
| MOp_R     | 0,9±0,16                | (2) (3) | 2,51±0,53  | (1) (4) | 2,55±0,63 | (1) (4) | 0,69±0,35 | (2) (3) |
| MOs_R     | 1,06±0,17               | (2) (3) | 2,5±0,55   | (1) (4) | 2,56±0,64 | (1) (4) | 0,8±0,4   | (2) (3) |
| SSp-n_R   | 0,59±0,23               | (2) (3) | 1,63±0,44  | (1)     | 2,43±0,7  | (1) (4) | 0,86±0,34 | (3)     |
| SSp-bfd_R | 1,09±0,88               | (2) (3) | 2,48±0,52  | (1) (4) | 2,51±0,64 | (1) (4) | 1,17±0,45 | (2) (3) |
| SSp-II_R  | 1,25±0,8                | (2) (3) | 2,38±0,53  | (1) (4) | 2,51±0,62 | (1) (4) | 0,86±0,5  | (2) (3) |
| SSp-m_R   | 0,56±0,2                | (2) (3) | 1,59±0,63  | (1)     | 2,2±0,68  | (1) (4) | 0,74±0,49 | (3)     |
| SSp-ul_R  | 0,86±0,3                | (2) (3) | 2,38±0,52  | (1) (4) | 2,49±0,62 | (1) (4) | 0,7±0,41  | (2) (3) |
| SSp-tr_R  | 1,15±0,31               | (2) (3) | 2,53±0,53  | (1) (4) | 2,49±0,63 | (1) (4) | 1,2±0,53  | (2) (3) |
| SSp-un_R  | 0,88±0,23               | (2) (3) | 2,25±0,65  | (1) (4) | 2,48±0,63 | (1) (4) | 0,92±0,45 | (2) (3) |
| VISal_R   | 0,88±0,24               | (2) (3) | 2,18±0,77  | (1) (4) | 2,57±0,68 | (1) (4) | 1,12±0,25 | (2) (3) |
| VISam_R   | 1,4±0,78                | (2) (3) | 2,65±0,51  | (1) (4) | 2,51±0,64 | (1) (4) | 1,24±0,49 | (2) (3) |
| VISp_R    | 0,79±0,19               | (2) (3) | 1,98±0,81  | (1) (4) | 2,57±0,69 | (1) (4) | 0,8±0,32  | (2) (3) |
| VISpm_R   | 1,53±0,7                | (2) (3) | 2,66±0,5   | (1)     | 2,56±0,66 | (1) (4) | 1,23±0,55 | (3)     |
| RSPagl_R  | 1,32±0,29               | (2) (3) | 2,66±0,52  | (1) (4) | 2,57±0,67 | (1) (4) | 1,22±0,54 | (2) (3) |
| RSPd_R    | 1,53±0,68               | (2) (3) | 2,65±0,53  | (1) (4) | 2,56±0,66 | (1) (4) | 0,98±0,49 | (2) (3) |
| VISa_R    | 1,53±0,67               | (2)     | 2,64±0,53  | (1) (4) | 2,49±0,64 | (4)     | 0,97±0,5  | (2) (3) |
| VISrl_R   | 1,46±0,74               | (2)     | 2,67±0,48  | (1) (4) | 2,51±0,65 | (4)     | 1,27±0,47 | (2) (3) |

**Table S7. Averaged response duration for each cortical region in four brain states, related to Figure 3f.**

Brain states: deep (1), medium (2), light (3), and awake (4). For each cortical area (row), the brain state's number is used on the right side to show significant differences from the other (\* p < 0.05, mixed-effects linear regression model with Bonferroni correction). Data are shown as mean ± SEM.
